# Supplementary material
Source: Royal Society of Chemistry journal article supplement (doi:10.1039/d6tc00203j)
Supplement: d6tc00203j1.pdf [file d6tc00203j1.pdf]

## Supplementary Information

Biomass-derived white light-emitting Carbon Dots for white LEDs

Akella Sai Radha Aishwarya, Bhargav Jyoti Bora, M Annadhasan\*

Department of Chemistry, Indian Institute of Technology Hyderabad, Kandi, Sangareddy,  
Telangana-502285, India. \*E-mail: [annadhasan@chy.iith.ac.in](mailto:annadhasan@chy.iith.ac.in)

## Table of Contents

|                  |                                                                                                                                                        |           |
|------------------|--------------------------------------------------------------------------------------------------------------------------------------------------------|-----------|
| <b>S1.1</b>      | Materials                                                                                                                                              | <b>4</b>  |
| <b>S1.2</b>      | Sample preparation for phytochemical analysis                                                                                                          | <b>4</b>  |
| <b>S1.3</b>      | Gas Chromatography-Mass Spectroscopy (GC-MS)                                                                                                           | <b>4</b>  |
| <b>S1.4</b>      | Metal-ion sensing studies                                                                                                                              | <b>5</b>  |
| <b>S2</b>        | Characterization                                                                                                                                       | <b>5</b>  |
| <b>Fig. S1.</b>  | GC-MS chromatogram of <i>E. oxypetalum</i> leaf extract in methanol.                                                                                   | <b>7</b>  |
| <b>Table S1.</b> | GC-MS phytochemical analysis of the methanolic extract of <i>E. oxypetalum</i> .                                                                       | <b>7</b>  |
| <b>Fig. S2.</b>  | (a) Fluorescence (FL) spectra of the methanolic plant extract before synthesis.<br>(b) The corresponding CIE plot.                                     | <b>11</b> |
| <b>Fig. S3.</b>  | (a) CIE plot of extracted and fresh leaves.<br>(b) The corresponding images under ambient and UV light.                                                | <b>11</b> |
| <b>Fig. S4.</b>  | (a) CIE plot of the CDs synthesized under different reaction conditions.<br>(b) The corresponding ambient and 365 nm UV light irradiation photographs. | <b>12</b> |
| <b>Fig. S5.</b>  | PXRD of the CDs.                                                                                                                                       | <b>12</b> |
| <b>Table S2.</b> | Elemental composition of the CDs.                                                                                                                      | <b>13</b> |

|                  |                                                                                                                                                                           |           |
|------------------|---------------------------------------------------------------------------------------------------------------------------------------------------------------------------|-----------|
| <b>Fig. S6.</b>  | EDAX elemental analysis of the CDs.                                                                                                                                       | <b>13</b> |
| <b>Table S3.</b> | Comparison between biomass-derived CDs in WLED fabrication.                                                                                                               | <b>14</b> |
| <b>Fig. S7.</b>  | Lifetime spectra of the CDs.                                                                                                                                              | <b>15</b> |
| <b>Table S4.</b> | Time-resolved FL data of the CDs.                                                                                                                                         | <b>15</b> |
| <b>Fig. S8.</b>  | (a) FL spectra of CDs at different pH levels.<br>(b) The corresponding CIE plot.<br>(c) Table representing CIE coordinates.                                               | <b>16</b> |
| <b>Fig. S9.</b>  | (a) FL spectra of CDs in the presence of different metal ions.<br>(b) Bar graph representing the relative FL intensity ( $I/I_0$ ) of the CDs towards various metal ions. | <b>16</b> |
| <b>Fig. S10.</b> | (a) FL spectrum of Silica powder.<br>(b) The corresponding CIE plot.                                                                                                      | <b>17</b> |
| <b>Fig. S11.</b> | (a) FL spectra of S-CDs.<br>(b) The corresponding CIE plot.                                                                                                               | <b>17</b> |
| <b>Fig. S12.</b> | (a) FL spectra of CDs in different solvents.<br>(b) The corresponding CIE plot.                                                                                           | <b>18</b> |
| <b>Fig. S13.</b> | FL spectra of (a) CDs-PVA<br>(b) CDs-PVP.                                                                                                                                 | <b>18</b> |
| <b>Fig. S14.</b> | FL spectrum of bare LED.                                                                                                                                                  | <b>19</b> |
| <b>Fig. S15.</b> | FL Spectra of CD-PMMA with different ratios.                                                                                                                              | <b>19</b> |
| <b>Fig. S16.</b> | (a) FL spectra of WLED under continuous operation.<br>(b) The corresponding CIE plot.<br>(c) Table representing CIE coordinates.                                          | <b>20</b> |

## **S1. Experimental Section**

**S1.1 Materials.** The *Epiphyllum oxypetalum* plant was purchased from a local nursery in Sangareddy, Hyderabad, and grown at home under optimal conditions, and used for the experiments. Methanol and hexane were purchased from FINAR, Polyvinylpyrrolidone K90 (PVP) from SRL chemicals, and Polyvinyl alcohol (PVA), Poly(methyl methacrylate) (PMMA) from BLD Pharm. Deionized (DI) water was used for the experiment. All the reagents and chemicals were used directly without further purification.

**S1.2 Preparation of the sample for phytochemical analysis.** Fifteen grams of the naturally dried leaf powder of *E. oxypetalum* were subjected to Soxhlet extraction using methanol as solvent. The powdered sample was made into a thimble with handmade filter paper. The leaf powder-filled thimble was carefully placed inside the extractor chamber and filled with methanol in a 1:10 ratio. The reservoir round-bottom flask was heated to 50-60 °C in a heating mantle. Twenty refluxes were run to get a good-quality powder extract. The resultant solvent extract was condensed using a rotary evaporator at reduced temperature under vacuum conditions. The resultant crude extract 1.659 g was collected in a container for further analysis and stored at -20 °C.

**S1.3 Gas Chromatography-Mass Spectroscopy (GC-MS).** The phytochemical compounds present in the methanol extract of the leaves of *E. oxypetalum* were identified through GC-MS analysis. The 50 mg crude extract was dissolved in 1 mL of GC-grade ethyl acetate, vortexed, and filtered through a 0.45 µm filter cartridge. Then, 3 µL of the sample is injected into the GC-MS instrument. The analysis was carried out in splitless mode, with the injector and transfer line temperatures set to 280 °C, and a pressure of 8.2317 psi. The separation was achieved using a DB-5ms column (30 m x 250 µm x 0.25 µm) with Helium as the carrier gas, at a flow rate of 1 mL/min. The oven temperature was programmed to range from 60 °C to 325 °C, with

a 1-minute equilibrium time through multiple ramps, resulting in a total run time of approximately 41 minutes. The GC-MS analysis was done by Whizbang Bioresearch Pvt Ltd, and the obtained mass spectra were compared with the NIST (National Institute of Standards and Technology) library for qualitative identification of compounds in the leaf sample.

**S1.4 Metal-ion sensing studies.** The fluorescence (FL) behavior of the carbon dots (CDs) towards various metal ions ( $\text{Na}^+$ ,  $\text{K}^+$ ,  $\text{Mg}^{2+}$ ,  $\text{Zn}^{2+}$ ,  $\text{Cu}^{2+}$ ,  $\text{Pb}^{2+}$ ,  $\text{Fe}^{3+}$ , and  $\text{Hg}^{2+}$ ) at 20  $\mu\text{M}$  concentration was investigated. For the blank measurement, the CD solution (synthesized in methanol) was mixed with 20  $\mu\text{L}$  of deionized water. For metal ions, 20  $\mu\text{L}$  of aqueous metal-ion solutions were added separately to the CD solution. The mixture was gently mixed, and the FL spectra were recorded under identical conditions. The relative FL intensity ( $I/I_0$ ) was calculated from the emission intensity at  $\sim 610$  nm, where  $I_0$  and  $I$  correspond to the FL intensity of the blank and metal-ion treated samples, respectively.

**S2. Characterization.** GC-MS was performed using an Agilent Technologies 7890B GC & 5977B MSD instrument. UV-visible absorbance spectra of the liquid samples were obtained on a Jasco V730 spectrophotometer, at a resolution of 1 nm. FL excitation, emission, and temperature-dependent spectra were measured in a HORIBA FluoroMax-4 spectrofluorometer. The ATR-IR spectra were recorded using the Bruker Alpha P Fourier Transform spectrometer. X-ray photoelectron spectroscopy (XPS) measurements were performed with a Shimadzu AXIS SUPRA monochromator using Al K $\alpha$  radiation of 1486 eV operated at 75W (40 mA emission current). TEM analysis was recorded with a JEOL JEM 2100FX. The TEM analysis was performed by placing a drop of carbon dot solution on a carbon-coated 200-mesh copper grid and allowing the solvent to evaporate. The PXRD measurements were done using a Rigaku Ultima IV instrument. Litesizer DLS 500 BM10 was used for Zeta potential measurement. Fluorescence quantum yield was calculated using a spectrofluorometer FS5 Edinburgh instrument by the direct method (absolute quantum yield) with an SC-30 integrating sphere.

Time-resolved fluorescence decay studies were performed using the TCSPC technique (Horiba Fluorohub) with an instrumental response function (IRF) of approximately 1 ns. Nano LED (Light-emitting Diode) with an excitation of 371 nm was used. TCSPC data were collected and fitted using DAS6 analysis software. All the parameters, Correlated Color Temperature (CCT), and Color Rendering Index (CRI), were calculated using ColorCalculator v7.71 software. All the fluorescent images were taken under a 365 nm UV LED flashlight.

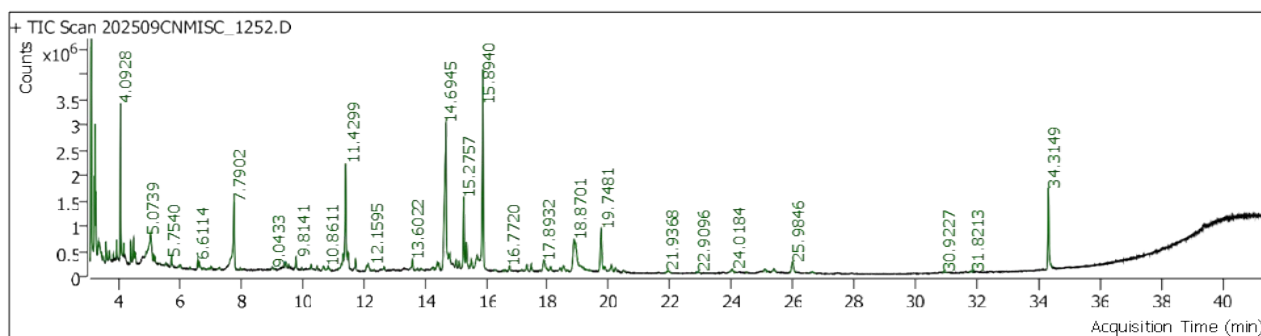

**Fig. S1.** GC-MS chromatogram of *E. oxypetalum* leaf extract in methanol.

**Table S1.** GC-MS phytochemical analysis of the methanolic extract of *E. oxypetalum*.

| Sno. | RT Min | Compound Name                                                | Molecular formula                                              | Area % of total |
|------|--------|--------------------------------------------------------------|----------------------------------------------------------------|-----------------|
| 1    | 3.1283 | 3-Hydroxybenzaldehyde, tert-butyl dimethylsilyl ether        | C <sub>13</sub> H <sub>20</sub> O <sub>2</sub> Si              | 4.65            |
| 2    | 3.1489 | 3-Hydroxybenzaldehyde, tert-butyl dimethylsilyl ether        | C <sub>13</sub> H <sub>20</sub> O <sub>2</sub> Si              | 5.14            |
| 3    | 3.2437 | 3-Hydroxy-4-methoxybenzaldehyde, TBDMS                       | C <sub>14</sub> H <sub>22</sub> O <sub>3</sub> Si              | 1.95            |
| 4    | 3.2726 | Disiloxane, 1,3-diethoxy-1,1,3,3-tetramethyl-                | C <sub>8</sub> H <sub>22</sub> O <sub>3</sub> Si <sub>2</sub>  | 3.26            |
| 5    | 3.3014 | Disiloxane, 1,3-diethoxy-1,1,3,3-tetramethyl-                | C <sub>8</sub> H <sub>22</sub> O <sub>3</sub> Si <sub>2</sub>  | 1.38            |
| 6    | 3.3880 | 2,6-Dihydroxyacetophenone, 2TMS derivative                   | C <sub>14</sub> H <sub>24</sub> O <sub>3</sub> Si <sub>2</sub> | 2.58            |
| 7    | 3.5281 | 2,4-Dimethoxy-2'-ethoxychalcone (isomer 2)                   | C <sub>19</sub> H <sub>20</sub> O <sub>4</sub>                 | 0.33            |
| 8    | 3.6270 | Diethyl sulfate                                              | C <sub>4</sub> H <sub>10</sub> O <sub>4</sub> S                | 0.62            |
| 9    | 3.7383 | 1-Hexanol, 2-ethyl-                                          | C <sub>8</sub> H <sub>18</sub> O                               | 0.29            |
| 10   | 3.8661 | Acetic acid, N'-[3-(1-hydroxy-1-phenylethyl)phenyl]hydrazide | C <sub>16</sub> H <sub>18</sub> N <sub>2</sub> O <sub>2</sub>  | 0.10            |
| 11   | 3.9650 | Cyclotrisiloxane, hexamethyl-                                | C <sub>6</sub> H <sub>18</sub> O <sub>3</sub> Si <sub>3</sub>  | 0.47            |
| 12   | 4.0928 | Cyclotrisiloxane, hexamethyl-                                | C <sub>6</sub> H <sub>18</sub> O <sub>3</sub> Si <sub>3</sub>  | 4.26            |
| 13   | 4.2082 | 2,5-Dihydroxybenzaldehyde, 2TMS derivative                   | C <sub>13</sub> H <sub>22</sub> O <sub>3</sub> Si <sub>2</sub> | 0.26            |
| 14   | 4.4308 | Silicic acid, diethyl bis(trimethylsilyl) ester              | C <sub>10</sub> H <sub>28</sub> O <sub>4</sub> Si <sub>3</sub> | 0.54            |
| 15   | 4.5215 | Isophorone                                                   | C <sub>9</sub> H <sub>14</sub> O                               | 0.61            |
| 16   | 4.5710 | Cyclopentasiloxane, decamethyl-                              | C <sub>10</sub> H <sub>30</sub> O <sub>5</sub> Si <sub>5</sub> | 0.51            |
| 17   | 4.9296 | 2-t-Butyl-5-propyl-[1,3]dioxolan-4-one                       | C <sub>10</sub> H <sub>18</sub> O <sub>3</sub>                 | 0.19            |
| 18   | 5.0739 | Dodecane                                                     | C <sub>12</sub> H <sub>26</sub>                                | 2.87            |
| 19   | 5.1687 | Naphthalene                                                  | C <sub>10</sub> H <sub>8</sub>                                 | 0.20            |
| 20   | 5.2222 | Benzoic acid, 2-(2-methylpropyl)oxy-, methyl ester           | C <sub>12</sub> H <sub>16</sub> O <sub>3</sub>                 | 0.16            |

|    |         |                                                                                     |                                                                 |      |
|----|---------|-------------------------------------------------------------------------------------|-----------------------------------------------------------------|------|
| 21 | 5.3706  | 5-(p-Aminophenyl)-4-phenyl-2-thiazolamine                                           | C <sub>15</sub> H <sub>13</sub> N <sub>3</sub> S                | 0.04 |
| 22 | 5.5809  | ((9-Methoxy-6a,11a-dihydro-6H-benzofuro [3,2-c]chromen-3-yl)trimethylsilane         | C <sub>19</sub> H <sub>22</sub> O <sub>4</sub> Si               | 0.12 |
| 23 | 5.7540  | Cyclotetrasiloxane, octamethyl-                                                     | C <sub>8</sub> H <sub>24</sub> O <sub>4</sub> Si <sub>4</sub>   | 0.43 |
| 24 | 6.0508  | Eicosane, 10-methyl-                                                                | C <sub>21</sub> H <sub>44</sub>                                 | 0.30 |
| 25 | 6.3682  | Cyclotetrasiloxane, octamethyl-                                                     | C <sub>8</sub> H <sub>24</sub> O <sub>4</sub> Si <sub>4</sub>   | 0.07 |
| 26 | 6.6114  | 2,4'-Dimethoxy-2'(tert.-butyldimethylsilyl)oxychalcone                              | C <sub>23</sub> H <sub>30</sub> O <sub>4</sub> Si               | 0.29 |
| 27 | 6.6608  | 4-Hydroxy-2-methylacetophenone                                                      | C <sub>9</sub> H <sub>10</sub> O <sub>2</sub>                   | 0.42 |
| 28 | 6.8010  | Benzamide, 4-nitro-N-(4,5,6,7-tetrahydro-3-cyanobenzothien-2-yl)                    | C <sub>16</sub> H <sub>13</sub> N <sub>3</sub> O <sub>3</sub> S | 0.07 |
| 29 | 6.9576  | Pentane-2,4-dione, 3-amino(1-piperazino)methylene-                                  | C <sub>10</sub> H <sub>17</sub> N <sub>3</sub> O <sub>2</sub>   | 0.09 |
| 30 | 7.0565  | Pyrrrolizin-1,7-dione-6-carboxylic acid, methyl(ester)                              | C <sub>9</sub> H <sub>11</sub> NO <sub>4</sub>                  | 0.17 |
| 31 | 7.3245  | Disulfide, di-tert-dodecyl                                                          | C <sub>24</sub> H <sub>50</sub> S <sub>2</sub>                  | 0.14 |
| 32 | 7.7902  | Tetradecane                                                                         | C <sub>14</sub> H <sub>30</sub>                                 | 4.99 |
| 33 | 7.9963  | 3-buten-2-one, 4-(5,5-dimethyl-1-oxaspiro[2.5]oct-4-yl)                             | C <sub>13</sub> H <sub>20</sub> O <sub>2</sub>                  | 0.07 |
| 34 | 9.0433  | 2,5,5,8a-Tetramethyl-6,7,8,8a-tetrahydro-5H-chromen-8-ol                            | C <sub>13</sub> H <sub>20</sub> O <sub>2</sub>                  | 0.16 |
| 35 | 9.4720  | Octadecane                                                                          | C <sub>18</sub> H <sub>38</sub>                                 | 0.24 |
| 36 | 9.5750  | Spiro-1-(cyclohex-2-ene)-2'-(5'-oxabicyclo[2.1.0]pentane), 1',4',2,6,6-pentamethyl- | C <sub>14</sub> H <sub>22</sub> O                               | 0.10 |
| 37 | 9.8141  | 2,4-Di-tert-butylphenol                                                             | C <sub>14</sub> H <sub>22</sub> O                               | 0.48 |
| 38 | 10.0037 | Hexadecanedioic acid, dimethyl ester                                                | C <sub>18</sub> H <sub>34</sub> O <sub>4</sub>                  | 0.04 |
| 39 | 10.3046 | Tetradecane, 2,6,10-trimethyl-                                                      | C <sub>17</sub> H <sub>36</sub>                                 | 0.22 |
| 40 | 10.5066 | Eicosane, 10-methyl-                                                                | C <sub>21</sub> H <sub>44</sub>                                 | 0.18 |
| 41 | 10.7045 | Dodecanoic acid                                                                     | C <sub>12</sub> H <sub>24</sub> O <sub>2</sub>                  | 0.31 |
| 42 | 10.8611 | Dodecane, 5,8-diethyl-                                                              | C <sub>16</sub> H <sub>34</sub>                                 | 0.30 |
| 43 | 11.2857 | E-15-Heptadecenal                                                                   | C <sub>17</sub> H <sub>32</sub> O                               | 0.39 |
| 44 | 11.3475 | 2-Hexadecanol                                                                       | C <sub>16</sub> H <sub>34</sub> O                               | 0.72 |
| 45 | 11.4299 | Diethyl Phthalate                                                                   | C <sub>12</sub> H <sub>14</sub> O <sub>4</sub>                  | 5.93 |
| 46 | 11.5165 | Pentafluoropropionic acid, 4-hexadecyl ester                                        | C <sub>19</sub> H <sub>33</sub> F <sub>5</sub> O <sub>2</sub>   | 0.77 |
| 47 | 11.7514 | Pentafluoropropionic acid, 4-hexadecyl ester                                        | C <sub>19</sub> H <sub>33</sub> F <sub>5</sub> O <sub>2</sub>   | 0.41 |

|    |         |                                                                             |                                                                |       |
|----|---------|-----------------------------------------------------------------------------|----------------------------------------------------------------|-------|
| 48 | 12.1101 | 2,4-Dimethyl-5,6-dimethoxy-8-aminoquinoline                                 | C <sub>13</sub> H <sub>16</sub> N <sub>2</sub> O <sub>2</sub>  | 0.22  |
| 49 | 12.1595 | Benzophenone                                                                | C <sub>13</sub> H <sub>10</sub> O                              | 0.44  |
| 50 | 12.3656 | Heptasiloxane,<br>1,1,3,3,5,5,7,7,9,9,11,11,13,13<br>-<br>tetradecamethyl-  | C <sub>14</sub> H <sub>44</sub> O <sub>6</sub> Si <sub>7</sub> | 0.04  |
| 51 | 12.6871 | Octane, 1,1'-oxybis-                                                        | C <sub>16</sub> H <sub>34</sub> O                              | 0.19  |
| 52 | 13.6022 | Tetradecane, 2,6,10-trimethyl-                                              | C <sub>17</sub> H <sub>36</sub>                                | 0.47  |
| 53 | 13.7753 | Pentadecane, 8-hexyl-                                                       | C <sub>21</sub> H <sub>44</sub>                                | 0.12  |
| 54 | 13.8825 | 7-Methyl-Z-tetradecen-1-ol<br>acetate                                       | C <sub>17</sub> H <sub>32</sub> O <sub>2</sub>                 | 0.10  |
| 55 | 14.2782 | Eicosane                                                                    | C <sub>20</sub> H <sub>42</sub>                                | 0.17  |
| 56 | 14.4101 | Dodecane, 5,8-diethyl-                                                      | C <sub>16</sub> H <sub>34</sub>                                | 0.33  |
| 57 | 14.4596 | Pentadecane, 8-hexyl-                                                       | C <sub>21</sub> H <sub>44</sub>                                | 0.32  |
| 58 | 14.6945 | Tetradecanoic acid                                                          | C <sub>14</sub> H <sub>28</sub> O <sub>2</sub>                 | 11.36 |
| 59 | 14.8100 | Benzyl Benzoate                                                             | C <sub>14</sub> H <sub>12</sub> O <sub>2</sub>                 | 0.66  |
| 60 | 15.0284 | 2-Cyclohexylpiperidine                                                      | C <sub>11</sub> H <sub>21</sub> N                              | 0.33  |
| 61 | 15.1232 | tert-Hexadecanethiol                                                        | C <sub>16</sub> H <sub>34</sub> S                              | 0.26  |
| 62 | 15.2757 | Tetradecanoic acid, ethyl ester                                             | C <sub>16</sub> H <sub>32</sub> O <sub>2</sub>                 | 3.28  |
| 63 | 15.3623 | Octadecane                                                                  | C <sub>18</sub> H <sub>38</sub>                                | 1.37  |
| 64 | 15.5231 | 2-Hexadecanol                                                               | C <sub>16</sub> H <sub>34</sub> O                              | 0.59  |
| 65 | 15.7127 | 3-Hexadecanol                                                               | C <sub>16</sub> H <sub>34</sub> O                              | 1.88  |
| 66 | 15.8940 | Isopropyl myristate                                                         | C <sub>17</sub> H <sub>34</sub> O <sub>2</sub>                 | 9.87  |
| 67 | 16.3227 | 7-Methyl-Z-tetradecen-1-ol<br>acetate                                       | C <sub>17</sub> H <sub>32</sub> O <sub>2</sub>                 | 0.06  |
| 68 | 16.6113 | Acetamide, N-methyl-N-[4-[2-<br>acetoxymethyl-1-pyrrolidyl]-2-<br>butynyl]- | C <sub>14</sub> H <sub>22</sub> N <sub>2</sub> O <sub>3</sub>  | 0.10  |
| 69 | 16.7720 | 1,2-Benzenedicarboxylic acid,<br>butyl octyl ester                          | C <sub>20</sub> H <sub>30</sub> O <sub>4</sub>                 | 0.25  |
| 70 | 17.1760 | Octadecane, 3-ethyl-5-(2-<br>ethylbutyl)-                                   | C <sub>26</sub> H <sub>54</sub>                                | 0.06  |
| 71 | 17.3326 | Z-4-Nonadecen-1-ol acetate                                                  | C <sub>21</sub> H <sub>40</sub> O <sub>2</sub>                 | 0.35  |
| 72 | 17.4686 | Z-4-Nonadecen-1-ol acetate                                                  | C <sub>21</sub> H <sub>40</sub> O <sub>2</sub>                 | 0.32  |
| 73 | 17.7489 | Phen-1,4-diol, 2,3-dimethyl-5-<br>trifluoromethyl-                          | C <sub>9</sub> H <sub>9</sub> F <sub>3</sub> O <sub>2</sub>    | 0.04  |
| 74 | 17.8932 | Octadecane, 3-ethyl-5-(2-<br>ethylbutyl)-                                   | C <sub>26</sub> H <sub>54</sub>                                | 1.10  |
| 75 | 18.1034 | Pilocarpine                                                                 | C <sub>11</sub> H <sub>16</sub> N <sub>2</sub> O <sub>2</sub>  | 0.18  |

|    |         |                                                                                  |                                                |      |
|----|---------|----------------------------------------------------------------------------------|------------------------------------------------|------|
| 76 | 18.4167 | Benzenepropanoic acid, 3,5-bis(1,1-dimethylethyl)-4-hydroxy-, methyl ester       | C <sub>18</sub> H <sub>28</sub> O <sub>3</sub> | 0.21 |
| 77 | 18.5238 | Malonic acid, 2-methylpentyl undecyl ester                                       | C <sub>20</sub> H <sub>38</sub> O <sub>4</sub> | 0.44 |
| 78 | 18.6599 | Octadecane, 3-ethyl-5-(2-ethylbutyl)-                                            | C <sub>26</sub> H <sub>54</sub>                | 0.07 |
| 79 | 18.8701 | n-Hexadecanoic acid                                                              | C <sub>16</sub> H <sub>32</sub> O <sub>2</sub> | 6.13 |
| 80 | 19.7481 | Hexadecanoic acid, ethyl ester                                                   | C <sub>18</sub> H <sub>36</sub> O <sub>2</sub> | 2.67 |
| 81 | 19.8635 | Eicosane                                                                         | C <sub>20</sub> H <sub>42</sub>                | 0.18 |
| 82 | 20.0820 | Benzenepropanoic acid, 3,5-bis(1,1-dimethylethyl)-4-hydroxy-,methyl ester        | C <sub>19</sub> H <sub>30</sub> O <sub>3</sub> | 0.55 |
| 83 | 20.2180 | 2-Hexadecanol                                                                    | C <sub>16</sub> H <sub>34</sub> O              | 0.21 |
| 84 | 20.4900 | 2-Methoxy-6,10-dimethyldodeca-2E,6Z,10Z-trienoic acid, 12-acetoxy-, methyl ester | C <sub>18</sub> H <sub>28</sub> O <sub>5</sub> | 0.11 |
| 85 | 21.9368 | E-15-Heptadecenoic acid                                                          | C <sub>17</sub> H <sub>32</sub> O <sub>2</sub> | 0.28 |
| 86 | 22.9096 | Octadecanoic acid, 4-hydroxy-, methyl ester                                      | C <sub>19</sub> H <sub>38</sub> O <sub>3</sub> | 0.11 |
| 87 | 24.0184 | Heptacosane                                                                      | C <sub>27</sub> H <sub>56</sub>                | 0.33 |
| 88 | 24.4925 | Octadecane, 3-ethyl-5-(2-ethylbutyl)-                                            | C <sub>26</sub> H <sub>54</sub>                | 0.05 |
| 89 | 25.0654 | trans-9-Octadecenoic acid, pentyl ester                                          | C <sub>23</sub> H <sub>44</sub> O <sub>2</sub> | 0.23 |
| 90 | 25.3746 | Hexadecane, 2,6,10,14-tetramethyl-                                               | C <sub>20</sub> H <sub>42</sub>                | 0.27 |
| 91 | 25.9846 | Octadecanoic acid, ethyl ester                                                   | C <sub>20</sub> H <sub>40</sub> O <sub>2</sub> | 0.95 |
| 92 | 26.6194 | 7-Methyl-Z-tetradecen-1-ol acetate                                               | C <sub>17</sub> H <sub>32</sub> O <sub>2</sub> | 0.16 |
| 93 | 30.9227 | Octadecane, 3-ethyl-5-(2-ethylbutyl)-                                            | C <sub>26</sub> H <sub>54</sub>                | 0.10 |
| 94 | 31.8213 | Octadecane, 3-ethyl-5-(2-ethylbutyl)-                                            | C <sub>26</sub> H <sub>54</sub>                | 0.08 |
| 95 | 34.3149 | Bis(2-ethylhexyl) phthalate                                                      | C <sub>24</sub> H <sub>38</sub> O <sub>4</sub> | 4.29 |

\*3.9238 (0.03%), 5.6344 (0.06%), 39.3893 (0.25%) RT peaks library match not found.

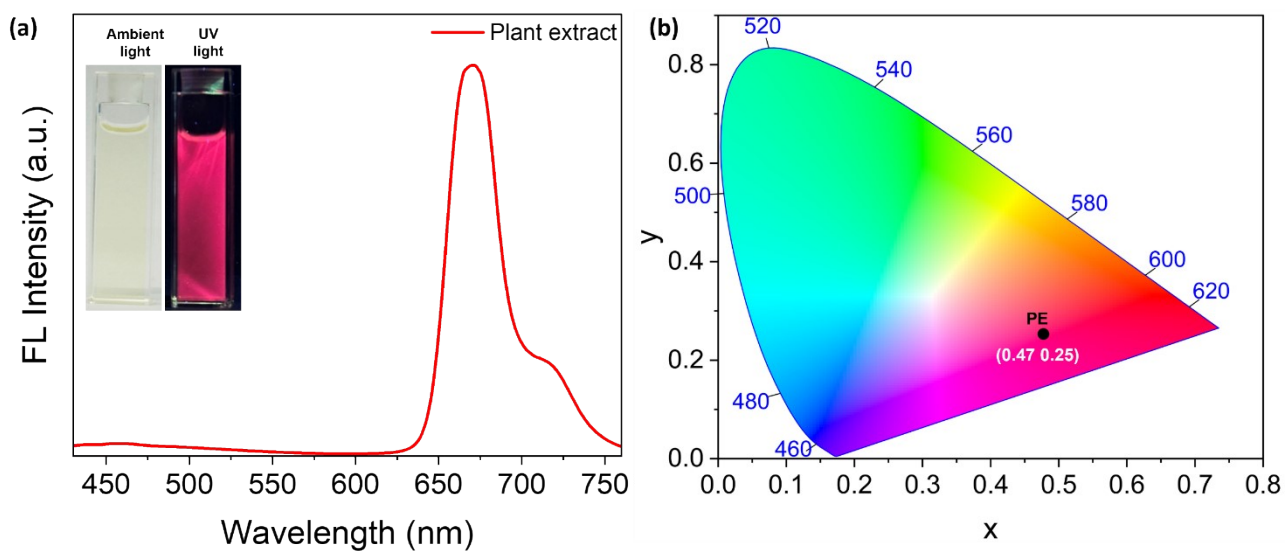

**Fig. S2.** (a) Fluorescence (FL) of the methanolic plant extract before synthesis. Insets show the extract under ambient and UV light, and (b) the corresponding CIE plot.

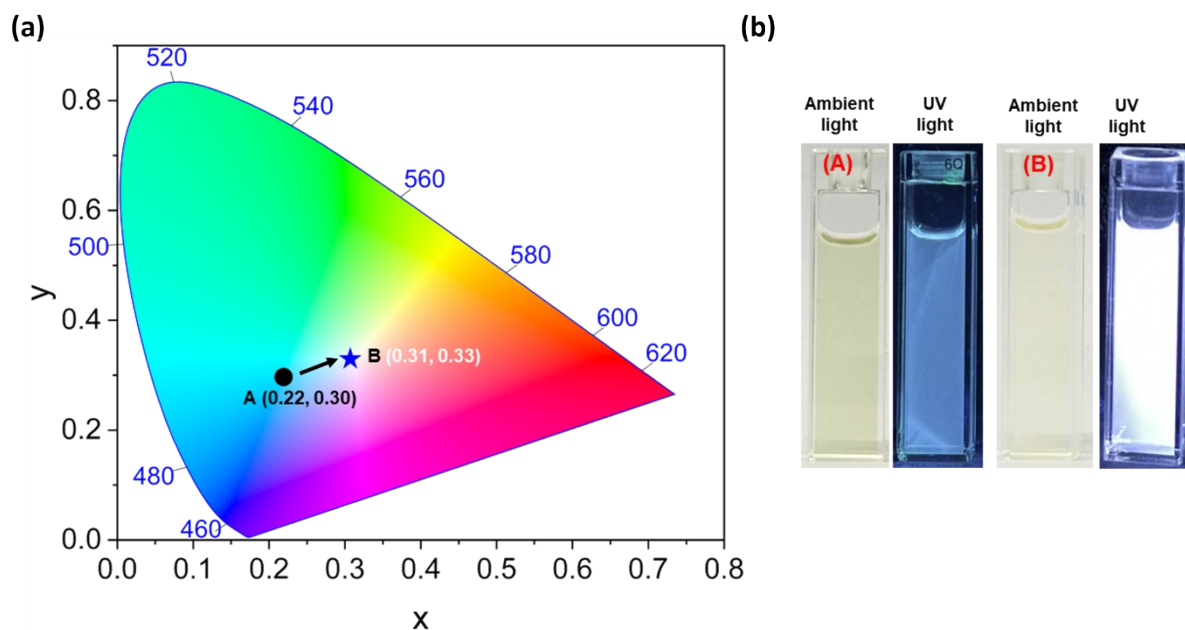

**Fig. S3.** (a) CIE plot of fresh (A) and extracted leaf (B), (b) the corresponding images under ambient and UV light.

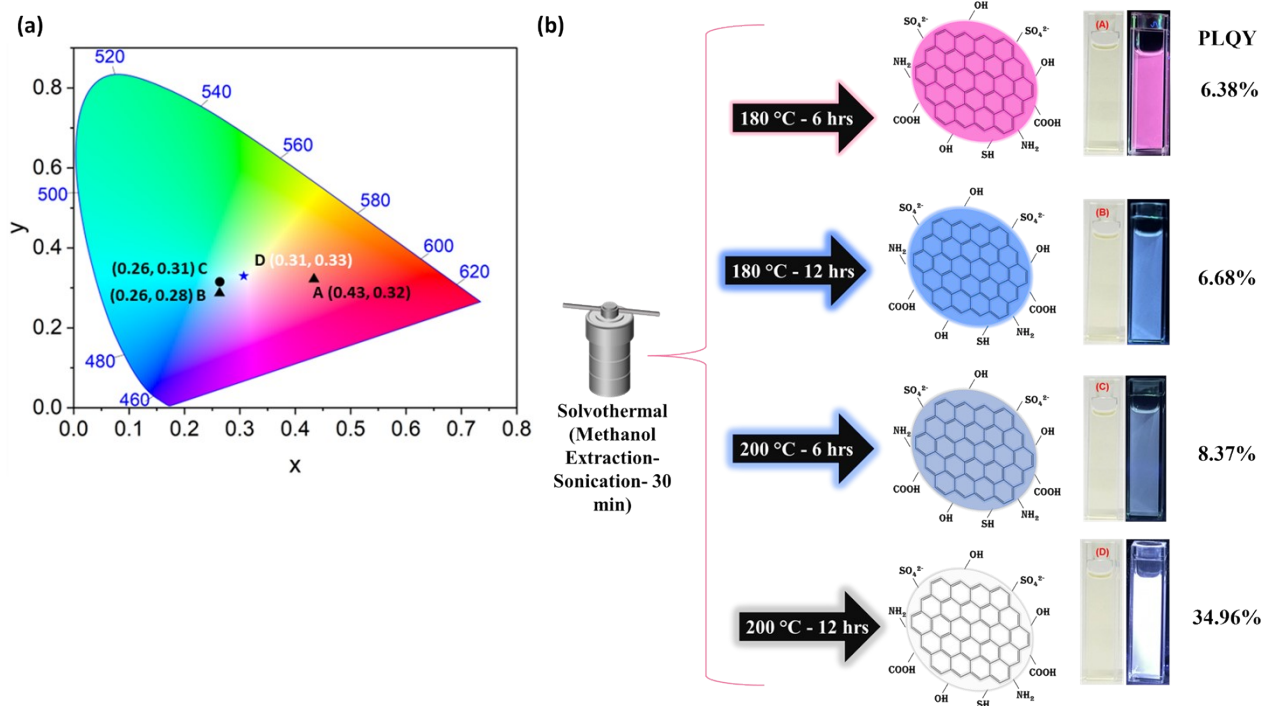

**Fig. S4.** (a) CIE plot of the CDs synthesized under different reaction conditions. (b) The corresponding ambient and 365 nm UV light irradiation photographs.

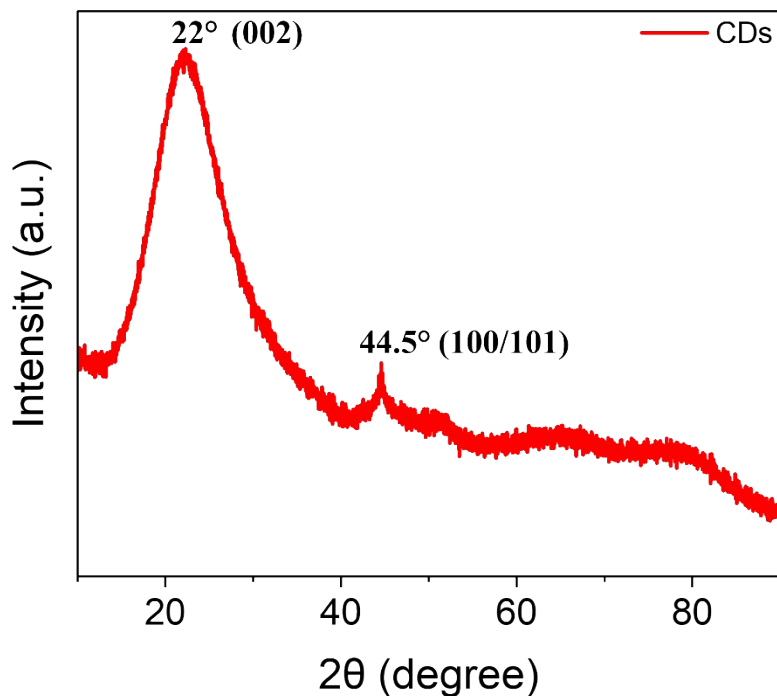

**Fig. S5.** PXRD of the CDs.

**Table S2.** Elemental composition of the CDs.

|     | C     | O     | N    | O/C  | N/C  |
|-----|-------|-------|------|------|------|
| CDs | 78.4% | 16.3% | 1.9% | 0.21 | 0.02 |

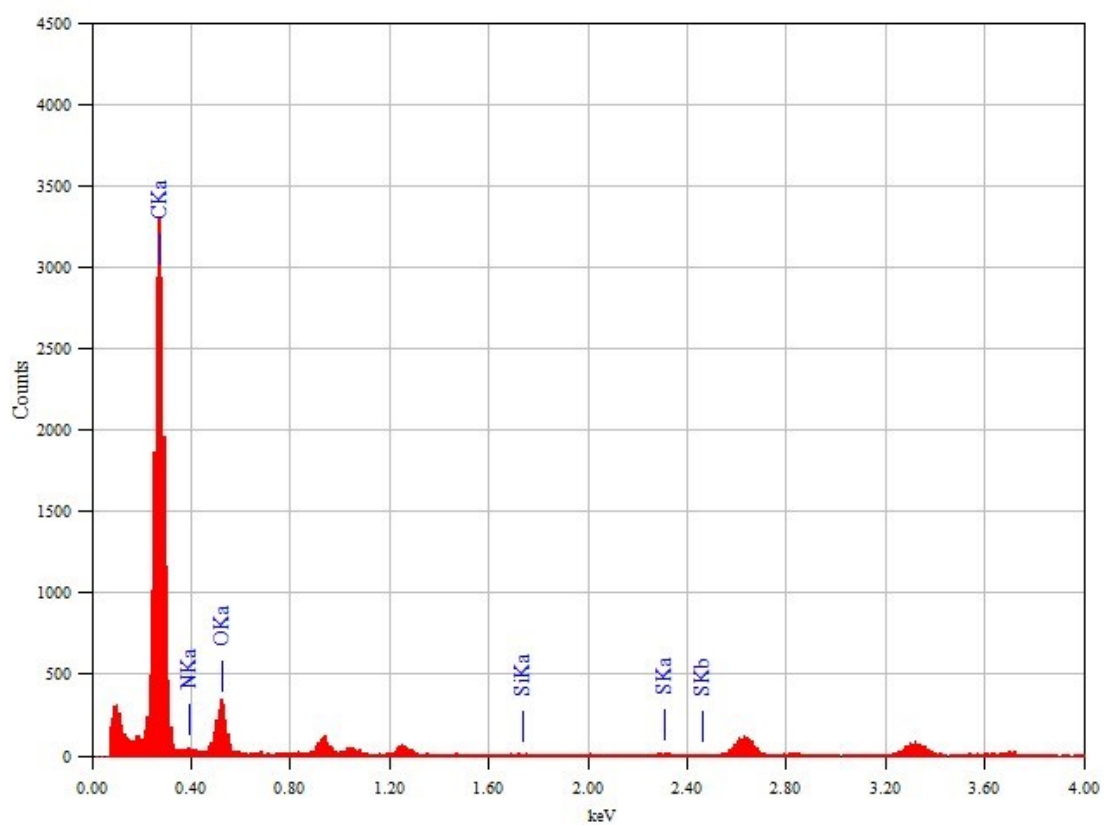

**Fig. S6.** EDAX elemental analysis of the CDs from TEM.

**Table S3.** Comparison between biomass-derived CDs in WLED fabrication.

| S. No | Source                                    | Method and Conditions                        | Dopants                                          | PLQY          | Emission strategy                        | CIE          | Ref              |
|-------|-------------------------------------------|----------------------------------------------|--------------------------------------------------|---------------|------------------------------------------|--------------|------------------|
| 1.    | Lemon peel                                | Hydrothermal, 180 °C-10 hrs                  | Ethylenediamine, m-phenylenediamine, glutathione | 35.58%        | RGB Mixing                               | (0.37, 0.32) | <sup>1</sup>     |
| 2.    | Areca nut husk                            | Hydrothermal, 120 °C- 3 hrs                  | -                                                | 63%           | Mixing Areca nut extract + Areca nut CDs | (0.28, 0.34) | <sup>2</sup>     |
| 3.    | Carrot                                    | Solvothermal, 200 °C-10 hrs                  | -                                                | 10%           | Mixing Crt-CDs, S-CDs, and P-CDs         | (0.34, 0.32) | <sup>3</sup>     |
| 4.    | Curry leaves                              | Microwave, 650 W, 8 min                      | -                                                | 23.1%         | RGB Mixing                               | (0.30, 0.35) | <sup>4</sup>     |
| 5.    | <i>Trachelospermum jasminoides</i> leaves | Solvothermal, 190 °C- 8 hrs                  | Zinc metal                                       | 19.8%         | RGB Mixing                               | (0.36, 0.32) | <sup>5</sup>     |
| 6.    | Mango leaves                              | Solvothermal, 200 °C-35 min                  | Ethylenediamine (EDA)                            | -             | CDs+ EDA                                 | (0.32, 0.32) | <sup>6</sup>     |
| 7.    | Neem and Fenugreek leaves                 | Hydrothermal, 300 °C- 8 hrs                  | -                                                | 41.2% & 38.9% | RGB Mixing                               | (0.31, 0.31) | <sup>7</sup>     |
| 8.    | Sichuan pepper seeds                      | Solvothermal, 180 °C-10 hrs, & 200 °C-12 hrs | 1,4-dihydroxynaphthalene                         | 85%           | RGB Mixing                               | (0.40, 0.39) | <sup>8</sup>     |
| 9.    | Tea residue                               | Microwave, 500 W, 12 min                     | -                                                | 13.42%        | Using R- CDs                             | (0.33, 0.37) | <sup>9</sup>     |
| 10.   | <i>Momordica monodelpha</i> leaves        | Solvothermal, 200 °C- 8 hrs                  | -                                                | 11% & 14%     | RGB Mixing                               | (0.32, 0.34) | <sup>10</sup>    |
| 11.   | Pulmeria leaves                           | Solvothermal, 160 °C- 8 hrs                  | Terbium acetate                                  | 39.49%        | CDs+ Tb <sup>3+</sup>                    | (0.33, 0.34) | <sup>11</sup>    |
| 12.   | <i>Epiphyllum oxypetalum</i> leaves       | Solvothermal, 200 °C-12 hrs                  | -                                                | 34.96%        | One-pot synthesis                        | (0.31, 0.34) | <b>This work</b> |

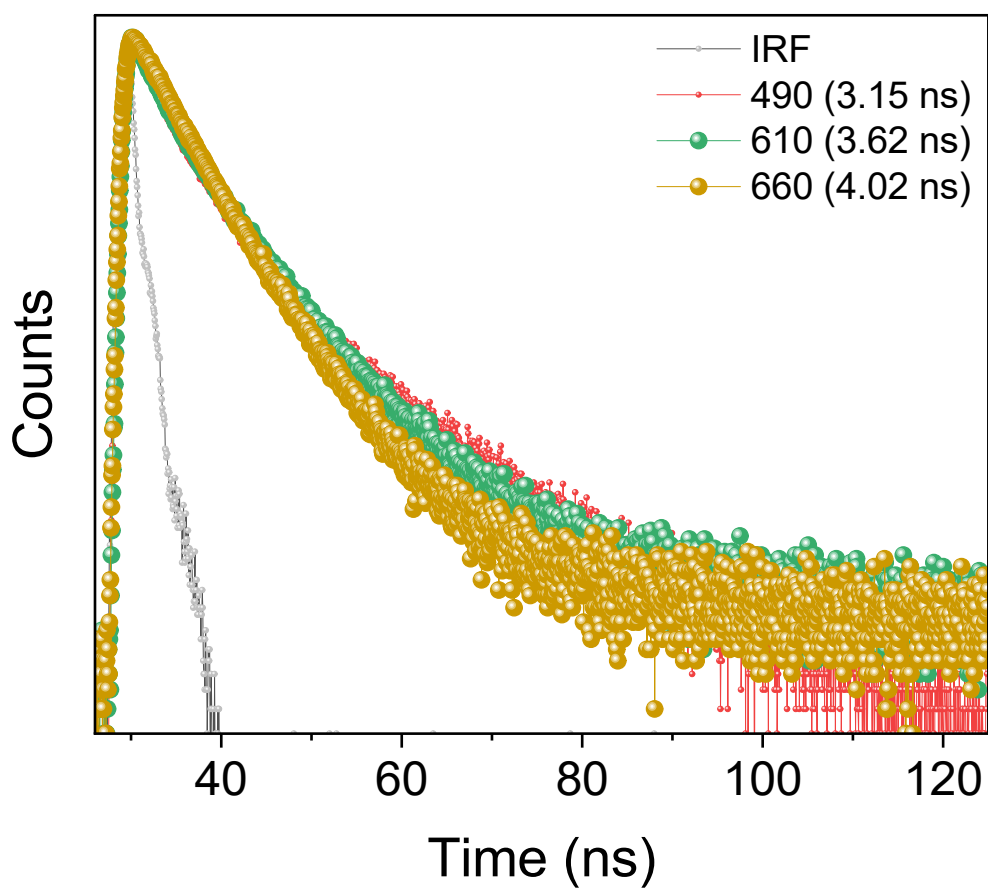

**Fig. S7.** Lifetime spectra of the CDs.

**Table S4.** Time-resolved FL data of the CDs.

| S. No | $\lambda_{em}$ (nm) | $\tau_1$ (ns) | $\alpha_1$ | $\tau_2$ (ns) | $\alpha_2$ | $\tau_3$ (ns) | $\alpha_3$ | $\tau_{av}$ (ns) |
|-------|---------------------|---------------|------------|---------------|------------|---------------|------------|------------------|
| 1.    | 490                 | 0.96<br>(54%) | 0.54       | 4.15<br>(37%) | 0.37       | 12.02<br>(9%) | 0.09       | 3.15             |
| 2.    | 610                 | 1.29<br>(53%) | 0.53       | 5.64<br>(42%) | 0.42       | 12.02<br>(5%) | 0.05       | 3.62             |
| 3.    | 660                 | 1.15<br>(26%) | 0.26       | 4.70<br>(71%) | 0.71       | 12.02<br>(3%) | 0.03       | 4.02             |

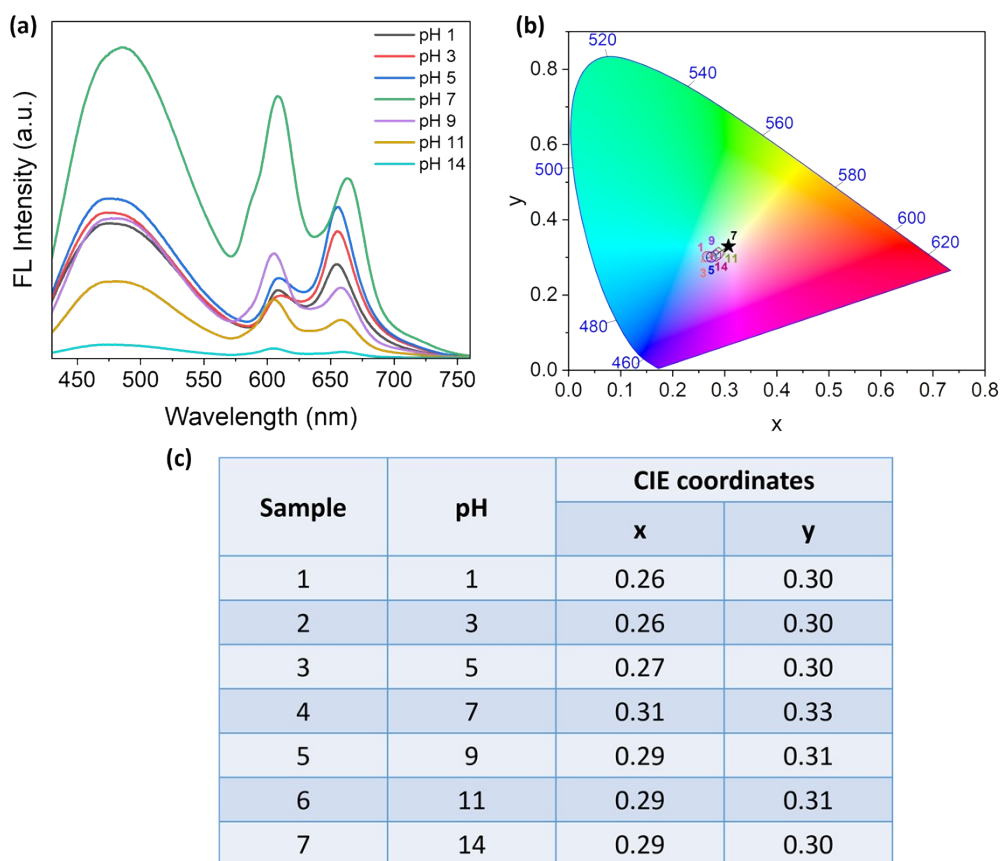

**Fig. S8.** (a) FL spectra of CDs at different pH values (pH 1-14). (b) It's corresponding CIE plot. (c) Table representing their corresponding CIE chromaticity coordinates values.

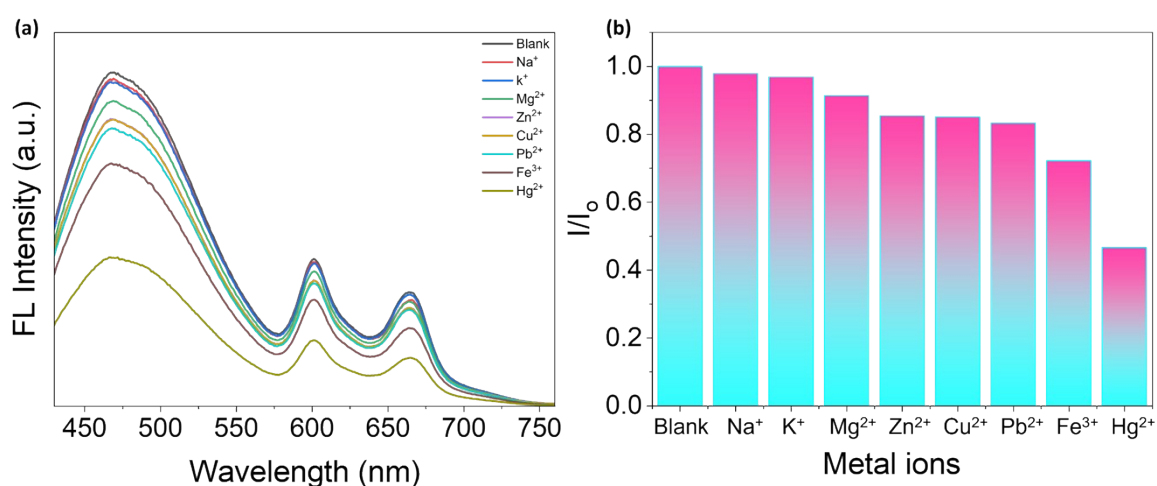

**Fig. S9.** (a) FL spectra of CDs in the presence of different metal ions. (b) Bar graph representing the relative FL intensity ( $I/I_0$ ) of the CDs towards various metal ions.

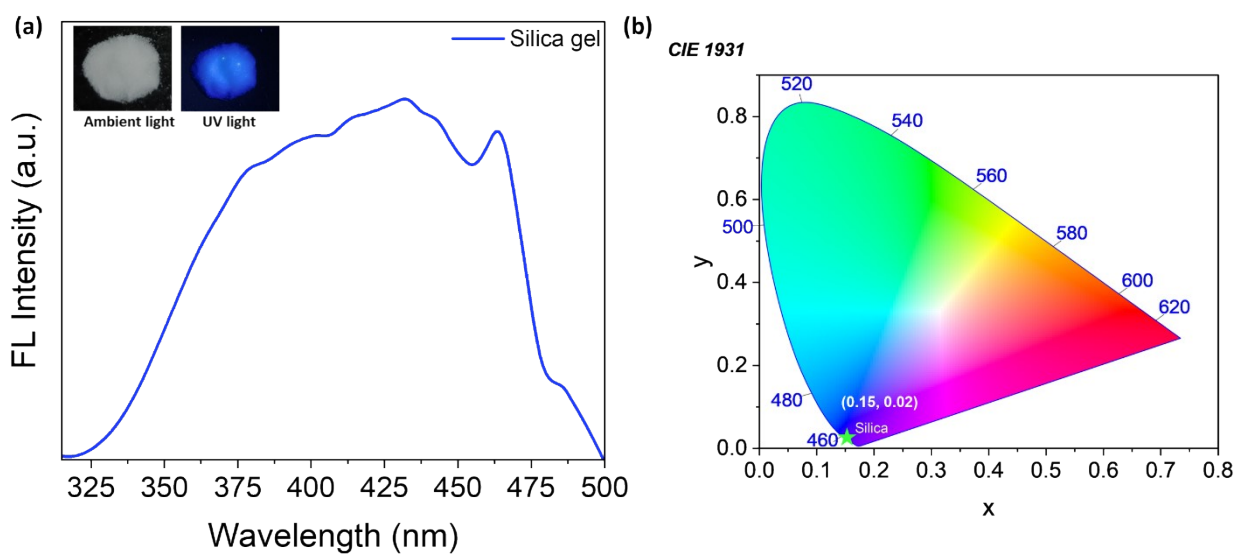

**Fig. S10.** (a) FL spectrum of Silica gel (insets photographs taken under ambient and UV light) and (b) the corresponding CIE plot.

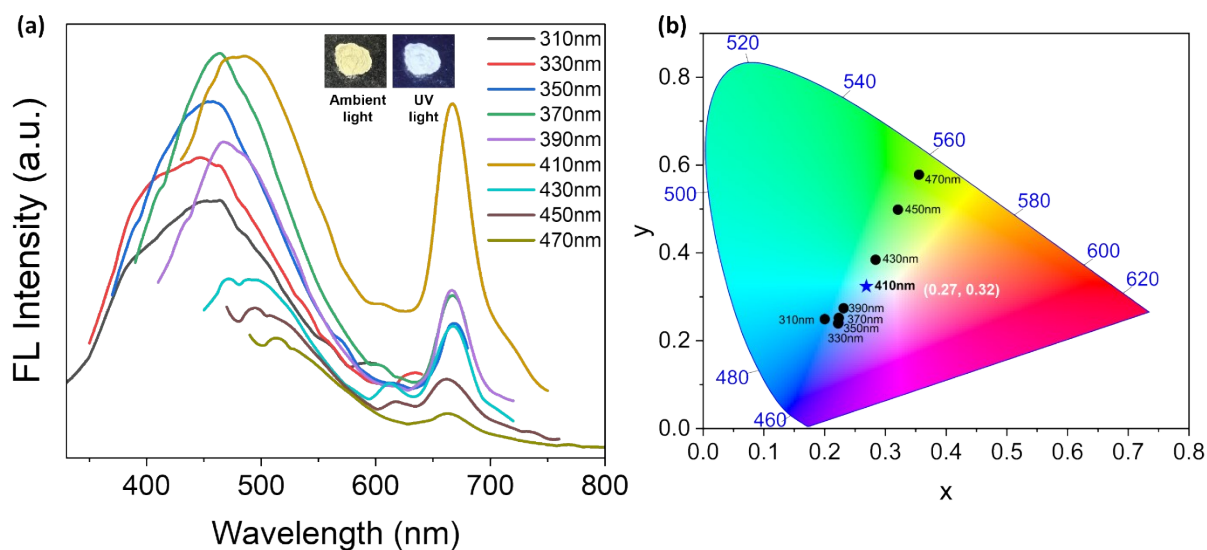

**Fig. S11.** (a) FL spectra of S-CDs (insets photographs taken under ambient and UV light) and (b) the corresponding spectra CIE plot.

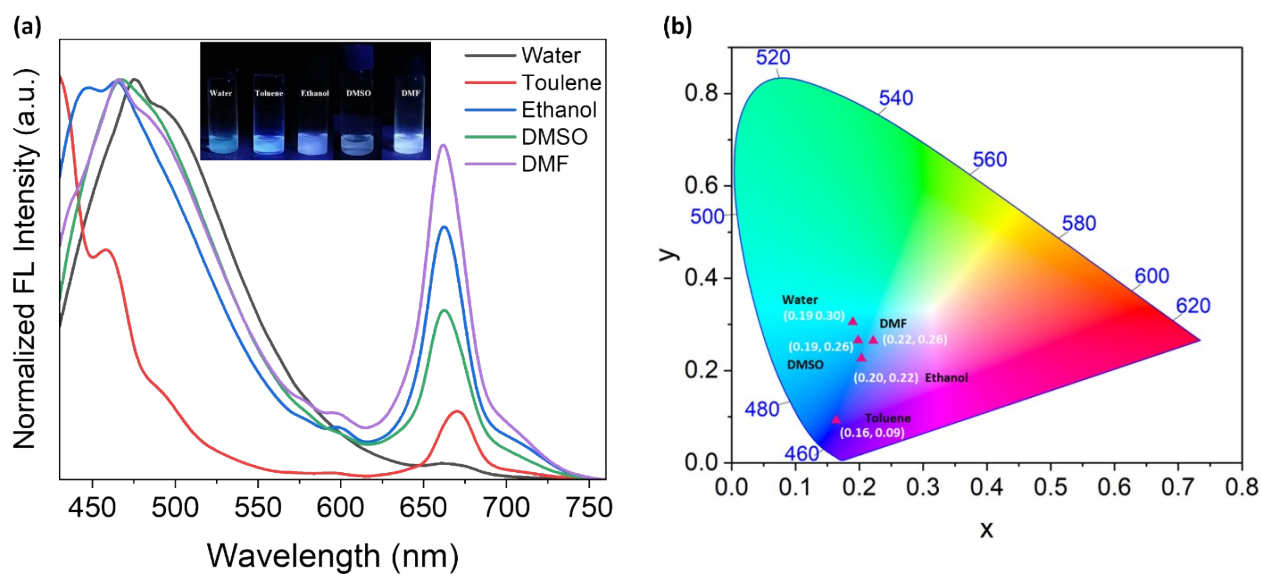

**Fig. S12.** (a) FL spectra of S-CDs dispersed in various solvents (insets photographs taken under ambient and UV light) and (b) the corresponding CIE plot.

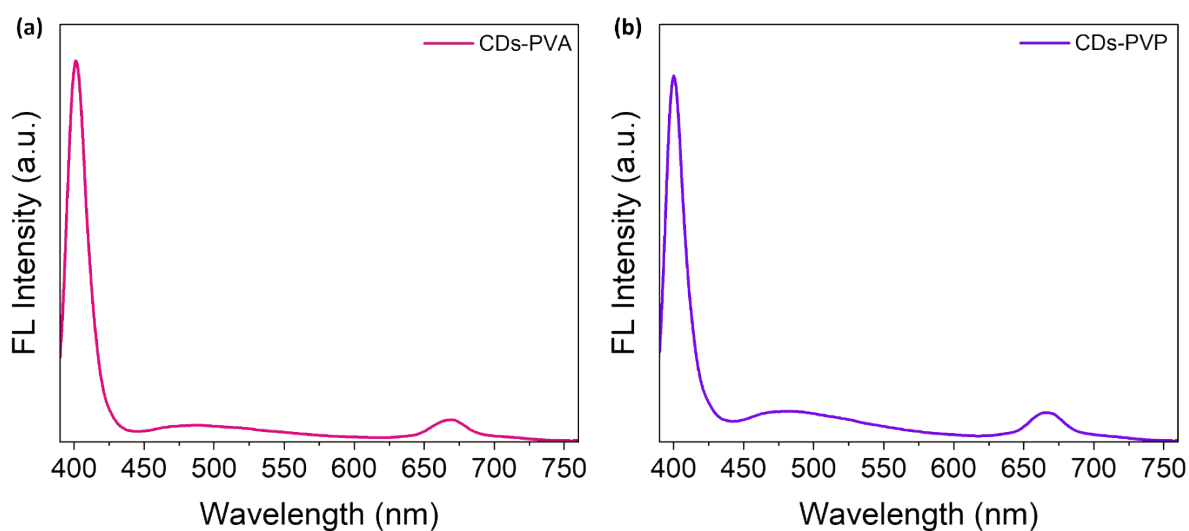

**Fig. S13.** FL spectra of CDs-polymer composites coated on 410 nm LED (a) PVA (b) PVP.

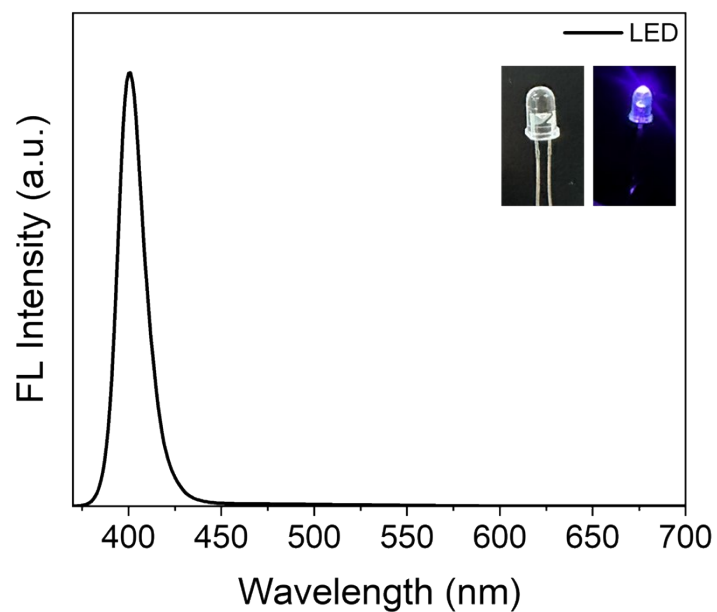

**Fig. S14.** FL spectrum of bare LED with insets showing photographs of bare LED under ambient light and UV light.

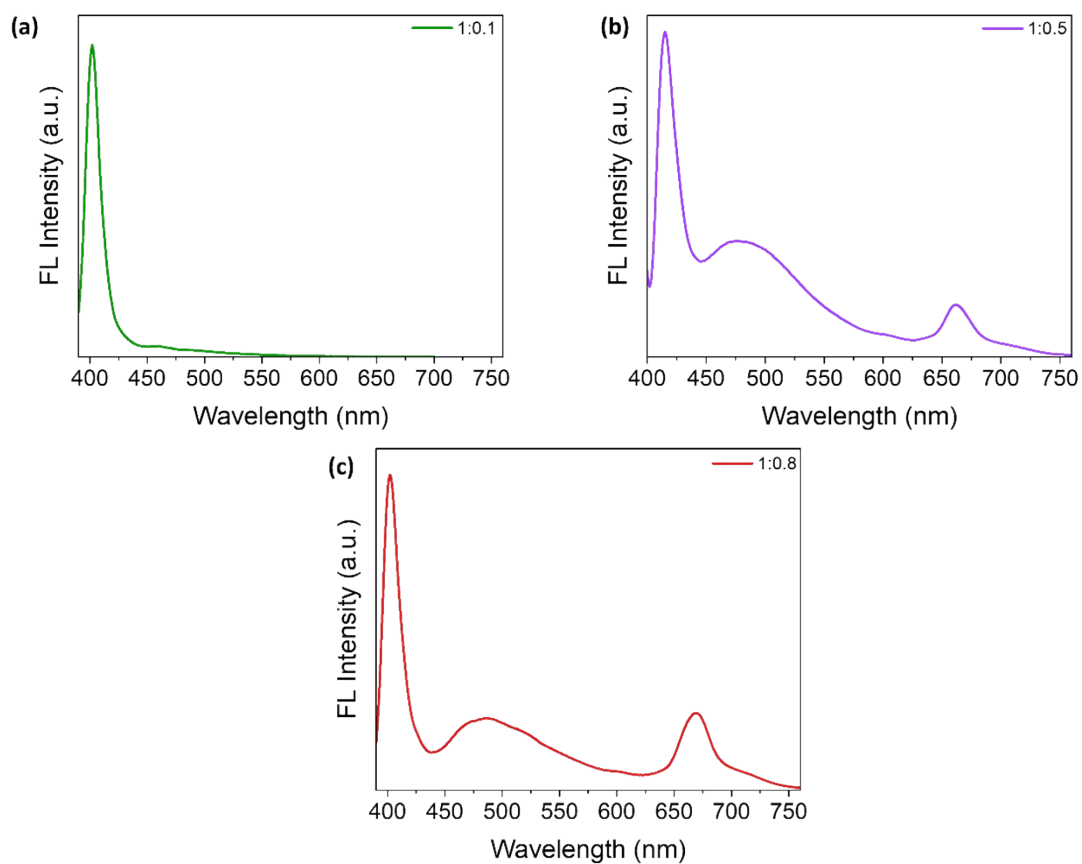

**Fig. S15.** FL spectra of CD-PMMA with (a) 1:0.1, (b) 1:0.5, and (c) 1:0.8 ratios.

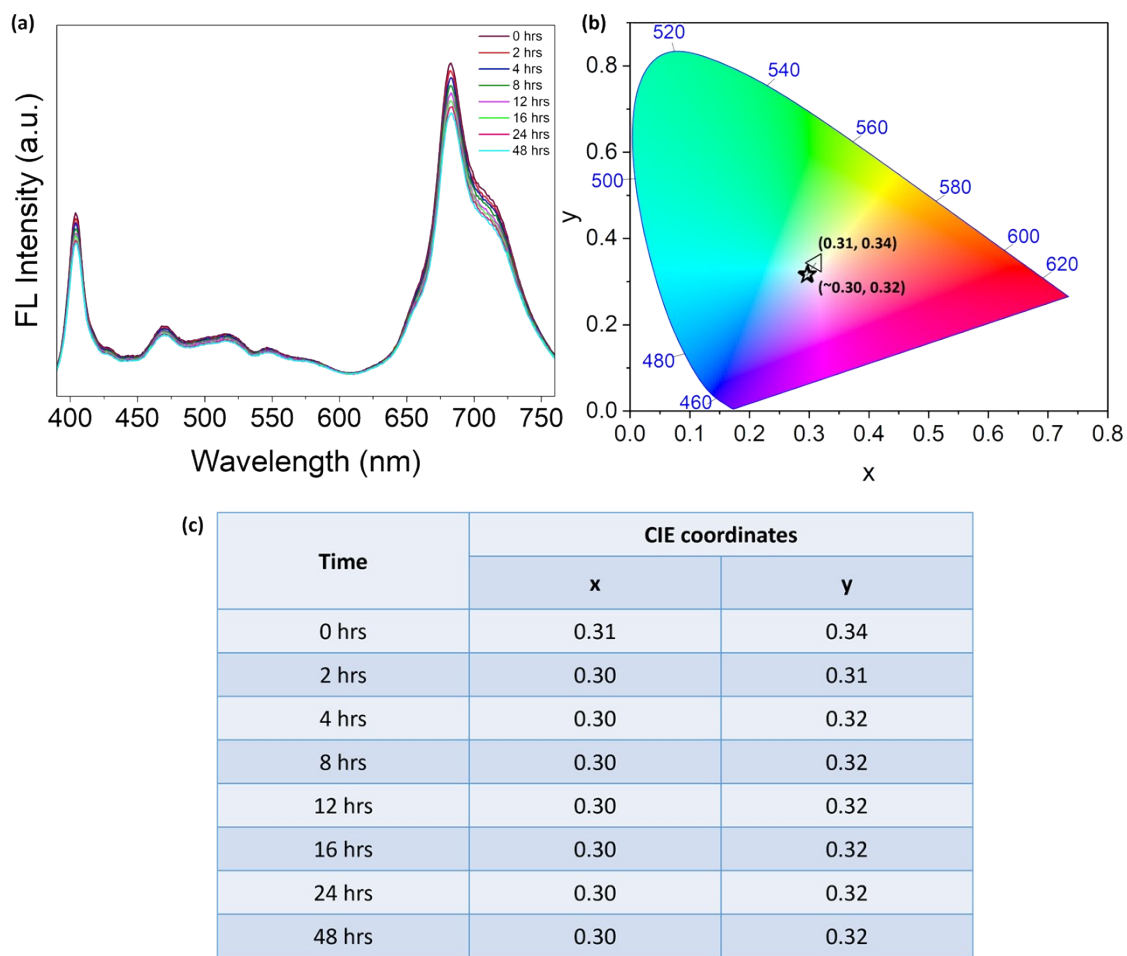

**Fig. S16.** (a) Emission spectra of WLED under continuous operation. (b) the corresponding CIE plot. (c) Table representing their corresponding CIE chromaticity coordinates values.

## References

- 1 A. Tyagi, K. M. Tripathi, N. Singh, S. Choudhary and R. K. Gupta, *RSC Adv.*, 2016, **6**, 72423–72432.
- 2 J. Mathew, J. Joy, A. Kumar S and J. Philip, *Journal of Luminescence*, 2019, **208**, 356–362.
- 3 K. Devi, V. Anand, V. Mutreja, D. Jamwal and P. Kumar, *New J. Chem.*, 2025, **49**, 13098–13112.
- 4 M. Maruthupandi, P. Varatharajan, I. B. Shameem Banu, M. Hafiz Mamat and N. Vasimalai, *Results in Optics*, 2022, **8**, 100249.
- 5 R. Kumari and S. K. Sahu, *Colloids and Surfaces A: Physicochemical and Engineering Aspects*, 2022, **647**, 128959.
- 6 H. Shi, C. Li, X. Ke, Y. Cai, S. Qian, L. Wu, Y. Deng, L. Sai and X. Xu, *Green Chemistry Letters and Reviews*, 2023, **16**, 2214178.
- 7 P. Roy, A. P. Periasamy, C. Chuang, Y.-R. Liou, Y.-F. Chen, J. Joly, C.-T. Liang and H.-T. Chang, *New J. Chem.*, 2014, **38**, 4946–4951.
- 8 H. Wang, X. Jin, Y. He, H. Bai, L. Ma, L. Zhao, L. Ding, H. Zhou, Q. Si and W. Chen, *ACS Sustainable Resour. Manage.*, 2024, **1**, 2255–2265.
- 9 C. Yong, Y. Lei, J. Du, Y. Liu, Y. Li, F. Ye, L. Xu, G. Ni and S. Zhang, *Analytica Chimica Acta*, 2025, **1345**, 343763.
- 10 A. Kumar, S. Sahoo, A. Singh and S. K. Sahu, *ACS Sustainable Resour. Manage.*, 2025, **2**, 993–1002.
- 11 R. Pratap, V. Vishal, S. Chaudhary and A. S. Parmar, *RSC Adv.*, 2023, **13**, 1974–1984.
